# Supplementary material
Source: PubMed Central journal article supplement (PMC3215003)
Supplement: 1110892108_pnas.201110892SI.pdf [file 1110892108_pnas.201110892SI.pdf]

# Supporting Information

Steptoe and Wardle 10.1073/pnas.1110892108

Table S1. PA and mortality in complete sample

| Factor                                    | Adjusted HR (95% CI) | P value |
|-------------------------------------------|----------------------|---------|
| PA                                        |                      |         |
| Low                                       | 1                    |         |
| Medium                                    | 0.800 (0.560–1.142)  | 0.22    |
| High                                      | 0.646 (0.436–0.958)  | 0.030   |
| Age                                       | 1.076 (1.049–1.104)  | 0.001   |
| Sex (female)                              | 0.548 (0.398–0.754)  | 0.001   |
| Wealth                                    |                      |         |
| 1 (lowest)                                | 1 (Reference)        |         |
| 2                                         | 0.923 (0.594–1.432)  | 0.72    |
| 3                                         | 0.743 (0.468–1.181)  | 0.21    |
| 4                                         | 1.042 (0.652–1.665)  | 0.86    |
| 5 (highest)                               | 0.895 (0.528–1.516)  | 0.68    |
| Education                                 |                      |         |
| Lower                                     | 1 (Reference)        |         |
| Intermediate                              | 1.307 (0.925–1.847)  | 0.13    |
| Higher                                    | 1.104 (0.711–1.715)  | 0.66    |
| Marital status (unmarried)                | 1.132 (0.802–1.598)  | 0.48    |
| Employment (not in paid employment)       | 1.317 (0.772–2.248)  | 0.312   |
| Depressive illness (past 2 y)             | 1.052 (0.231–4.785)  | 0.95    |
| Depression (elevated CES-D)               | 0.948 (0.642–1.372)  | 0.74    |
| Fair or poor self-rated health            | 2.405 (1.703–3.396)  | 0.001   |
| Cancer at baseline                        | 3.037 (2.139–4.311)  | 0.001   |
| CHD at baseline                           | 0.742 (0.397–1.389)  | 0.35    |
| Diabetes at baseline                      | 0.995 (0.614–1.612)  | 0.98    |
| Heart failure at baseline                 | 3.244 (0.659–15.979) | 0.15    |
| Stroke at baseline                        | 1.893 (1.010–3.549)  | 0.047   |
| Chronic lung disease at baseline          | 2.157 (1.393–3.340)  | 0.001   |
| Smoking                                   | 1.653 (1.120–2.438)  | 0.011   |
| Alcohol at least daily                    | 0.933 (0.668–1.302)  | 0.68    |
| No vigorous or moderate physical activity | 1.426 (1.009–2.017)  | 0.045   |

Proportional-hazards model including all covariates.

**Table S2. PA and mortality: Survivors for at least 6 mo**

| Model | Covariates                                                                                                                                 | PA level | PA-adjusted HR (95% CI) | P value |
|-------|--------------------------------------------------------------------------------------------------------------------------------------------|----------|-------------------------|---------|
| 1     | Age, sex                                                                                                                                   | Low      | 1                       |         |
|       |                                                                                                                                            | Medium   | 0.638 (0.451–0.903)     | 0.011   |
|       |                                                                                                                                            | High     | 0.513 (0.354–0.744)     | 0.001   |
| 2     | Age, sex + demographic factors*                                                                                                            | Low      | 1                       |         |
|       |                                                                                                                                            | Medium   | 0.656 (0.463–0.929)     | 0.018   |
|       |                                                                                                                                            | High     | 0.529 (0.364–0.768)     | 0.001   |
| 3     | Age, sex + demographic factors* + negative affect indicators <sup>†</sup>                                                                  | Low      | 1                       |         |
|       |                                                                                                                                            | Medium   | 0.689 (0.481–0.987)     | 0.042   |
|       |                                                                                                                                            | High     | 0.565 (0.382–0.837)     | 0.004   |
| 4     | Age, sex + demographic factors* + negative affect indicators <sup>†</sup> + health indicators <sup>‡</sup>                                 | Low      | 1                       |         |
|       |                                                                                                                                            | Medium   | 0.749 (0.521–1.078)     | 0.120   |
|       |                                                                                                                                            | High     | 0.637 (0.429–0.947)     | 0.026   |
| 5     | Age, sex + demographic factors* + negative affect indicators <sup>†</sup> + health indicators <sup>‡</sup> + health behaviors <sup>§</sup> | Low      | 1                       |         |
|       |                                                                                                                                            | Medium   | 0.759 (0.527–1.093)     | 0.14    |
|       |                                                                                                                                            | High     | 0.652 (0.439–0.970)     | 0.035   |

Reference group is low PA; 65 of 922 deaths in low-PA group; 63 of 1,523 in medium-PA group; 49 of 1,398 in high-PA group.

\*Demographic factors: wealth, education, marital status, and employment status.

<sup>†</sup>Negative affect indicators: negative affect, elevated CES-D score, and depressive illness in the past 2 y.

<sup>‡</sup>Health indicators: self-rated health, cancer, CHD, stroke, diabetes, heart failure, and chronic lung disease.

<sup>§</sup>Health behaviors: smoking, physical activity, and alcohol intake.
